# Supplementary material for: Monocyte chemoattractant protein 1 as a potential biomarker for immune checkpoint inhibitor‐associated neurotoxicity
Source: PubMed Central journal article supplement (PMC10166892; doi:10.1002/cam4.5695), 2023-02-16
Supplement: CAM4-12-9373-s001.pdf [file CAM4-12-9373-s001.pdf]

Supplemental material

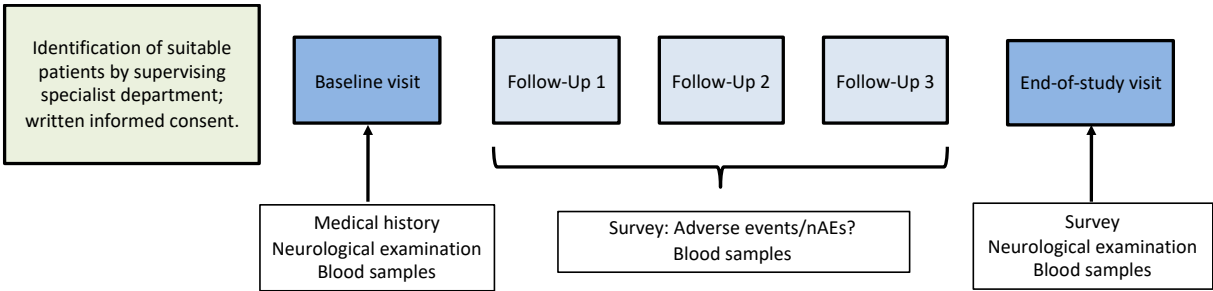

**Supplemental figure 1:** Study design and procedure. End-of-study visit is performed 6 months after baseline examination. Interval between the individual follow-up visits is 3-4 weeks. nAE: neurological adverse event.

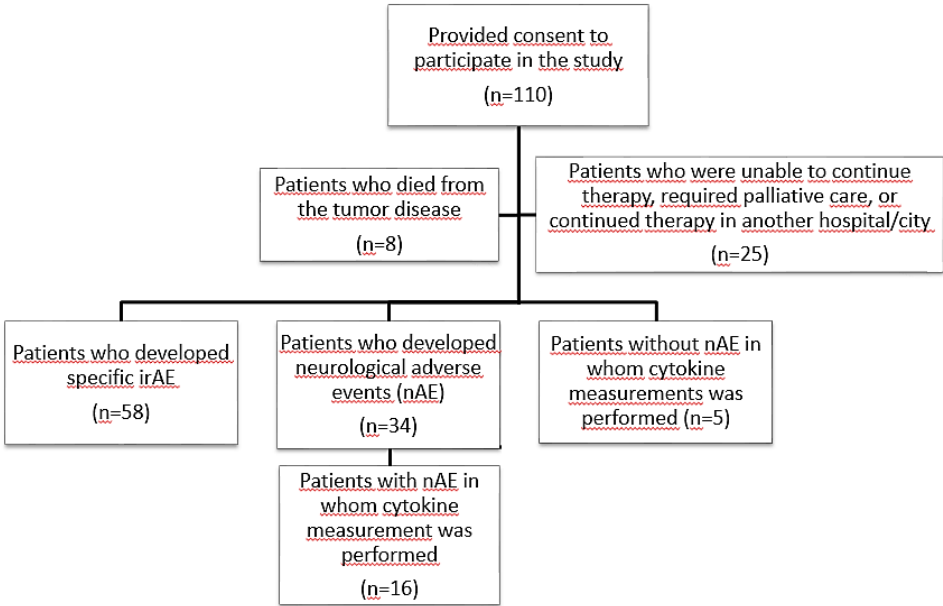

**Supplemental figure 2:** Consort figure. irAE: immune-related adverse events, nAE: neurological adverse events. 77 patients (90.6%) were still alive at time of last follow-up EOS. Eight patients (9.4%) died from the tumor disease during study conduction, while 25 patients (22.7%) discontinued the study early because they were unable to continue therapy, required palliative care, or continued therapy in another hospital/city.

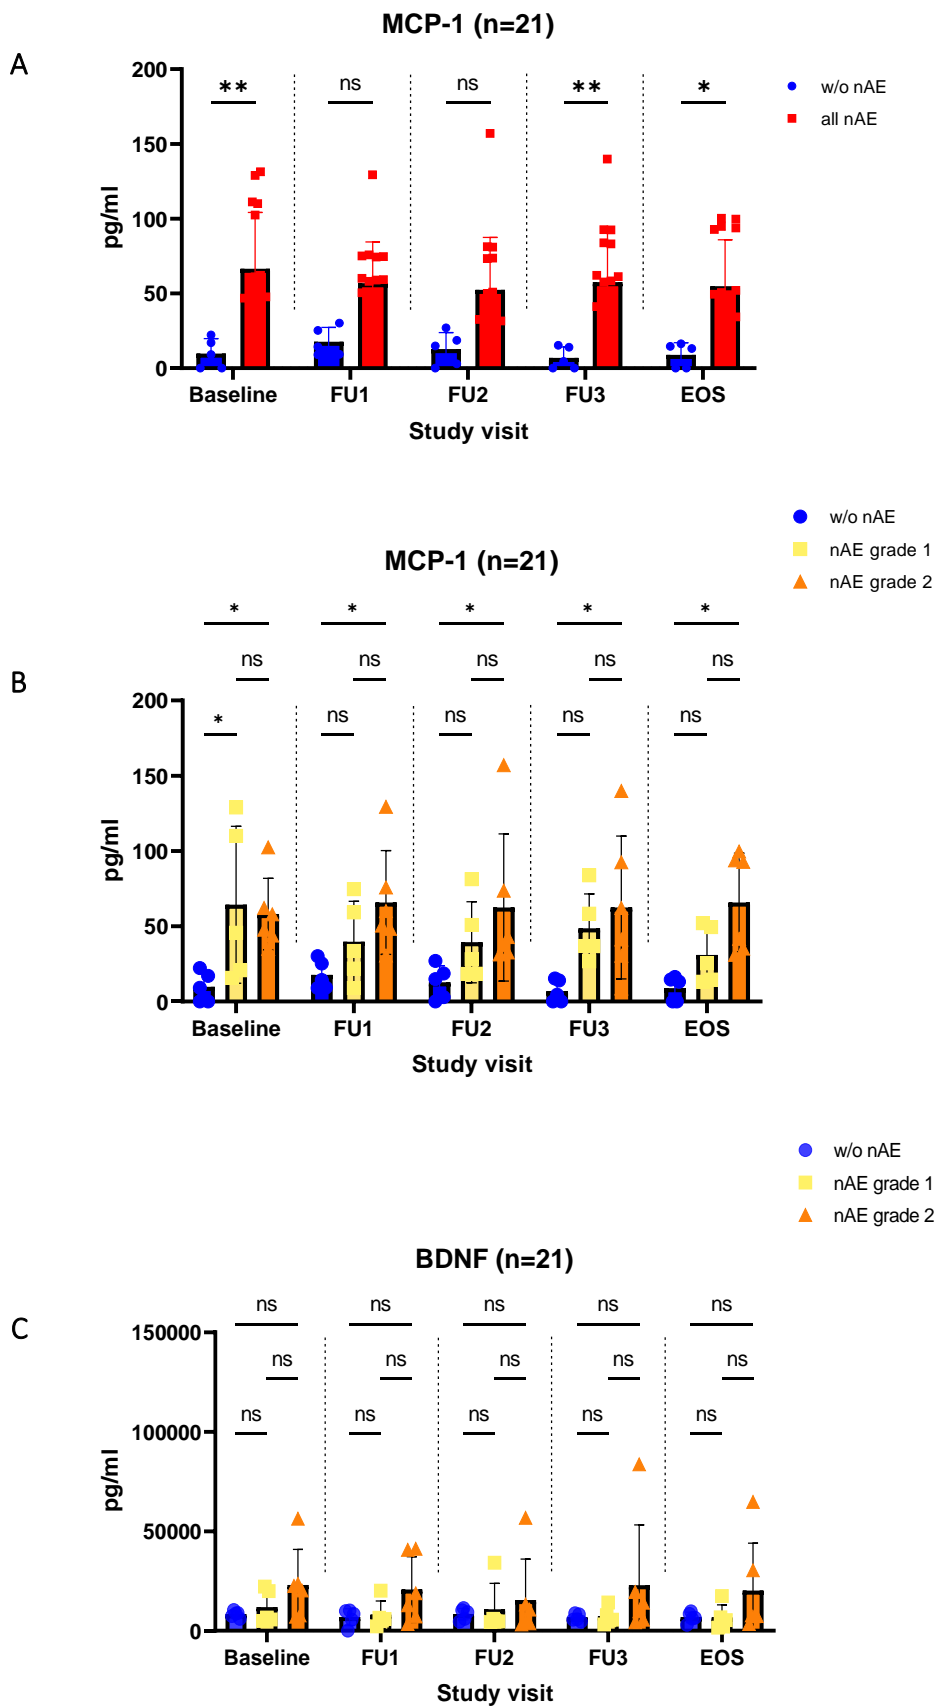

**Supplemental figure 3:** Cytokine measurement in patients with and without ICI-associated neurotoxicity. A) Serum monocyte chemoattractant protein 1 (MCP-1) concentrations, pooled comparison of all nAE(+) patients and patients without nAE. B) MCP-1 serum levels, comparison of patients without nAE

and those with nAE grade 1 and nAE grade 2. C) Serum levels of brain derived neurotrophic factor (BDNF), comparison of patients without nAE and those with nAE grade 1 and nAE grade 2. EOS: end-of-study, FU: follow-up, nAE: neurological adverse events, ns: not significant. \*\* p<0.01, \* p<0.05.

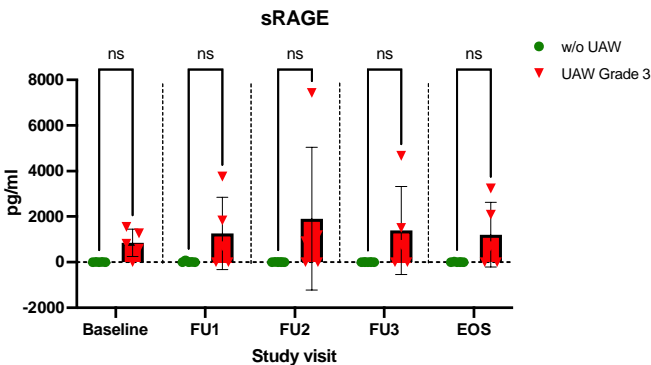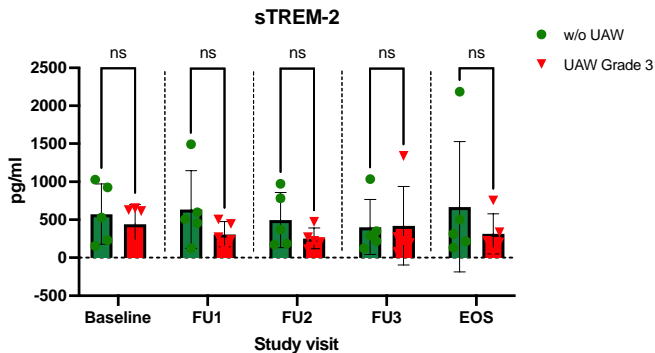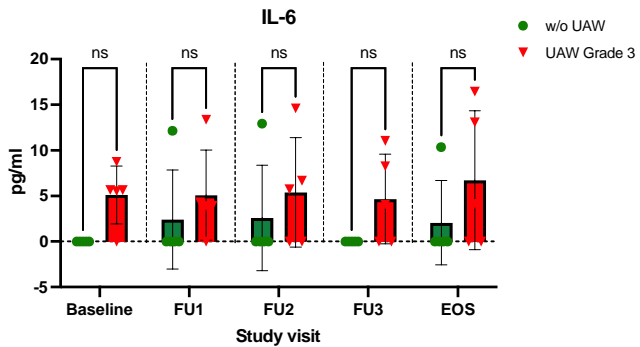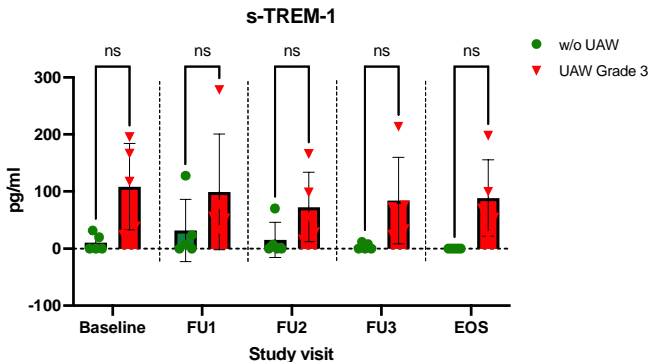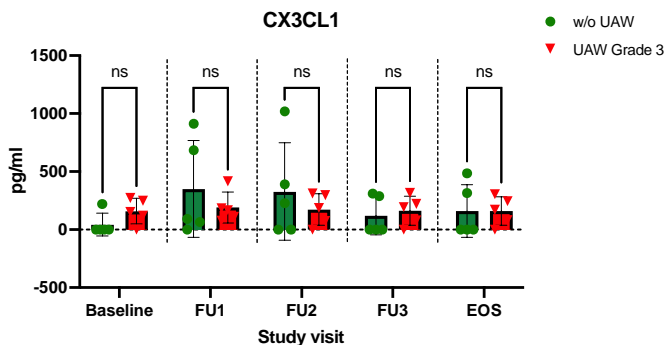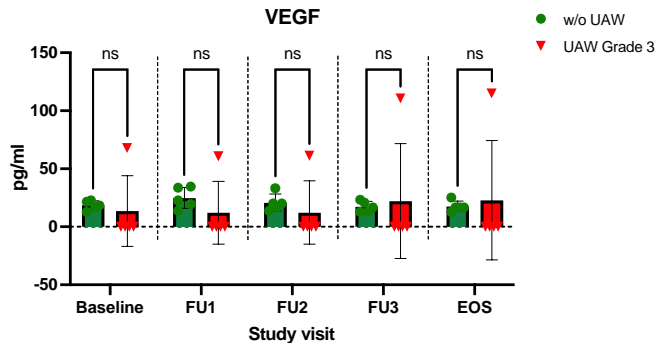

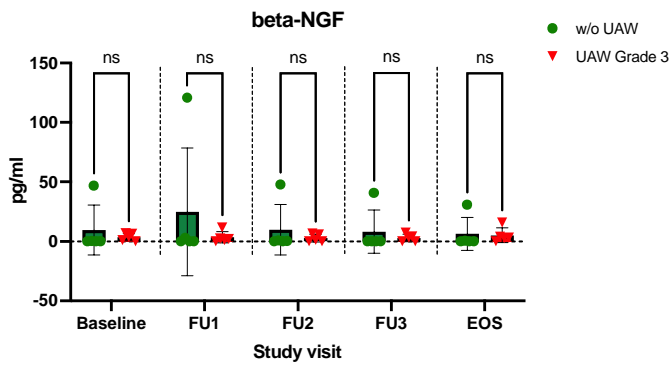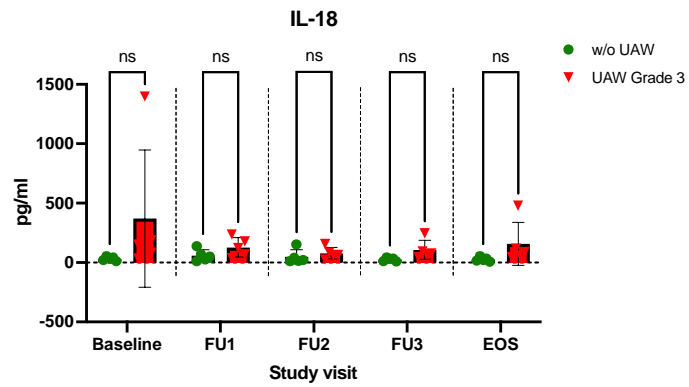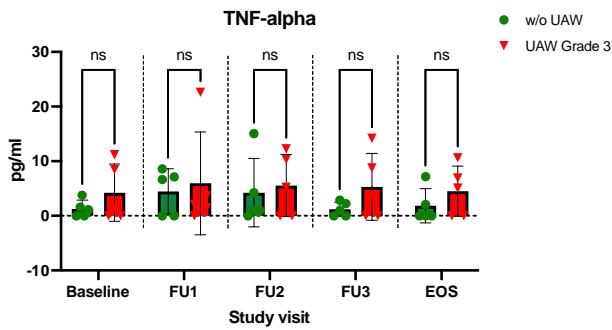

**Supplemental figure 4:** Presentation of all cytokines for which no significant difference was found in patients with and without higher-grade nAE. CX3CL: cytokine-induced neutrophil chemoattractant type-1, EOS: end-of-study, FU: follow-up, IL: interleukin, nAE: neurological adverse events, NGF: nerve growth factor, ns: not significant, sRAGE: soluble receptor for advanced glycation end products, TGF: transforming growth factor, TNF: tumor necrosis factor, TREM: triggering receptor expressed on myeloid cells, VEGF: vascular endothelial growth factor.

**Supplemental table 1:** Characteristics of “serum-subgroup”

| Patient Nr | Age at ICI start | Sex | Underlying tumor disease | Nr of systemic therapies prior to ICI | Relevant comorbidities | Substance ICI            | Termination of ICI due to AE (0= no, 1=yes) | Pausing ICI due to AE (0= no, 1=yes) | Hospitalisation due to AE (0= no, 1=yes) | Details irAE including nAE                                                                                                          | Neurotoxicity CTCAE grade |
|------------|------------------|-----|--------------------------|---------------------------------------|------------------------|--------------------------|---------------------------------------------|--------------------------------------|------------------------------------------|-------------------------------------------------------------------------------------------------------------------------------------|---------------------------|
| 1          | 74               | f   | Malignant melanoma       | 1                                     | Cardiovascular         | Nivolumab                | 0                                           | 0                                    | 0                                        | Pruritus                                                                                                                            | 0                         |
| 2          | 56               | m   | Malignant melanoma       | 1                                     | None                   | Nivolumab                | 0                                           | 0                                    | 0                                        | None                                                                                                                                | 0                         |
| 3          | 30               | m   | Malignant melanoma       | 0                                     | None                   | Nivolumab                | 0                                           | 0                                    | 0                                        | Dysesthesia right scalp, pain left lower abdomen                                                                                    | 0                         |
| 4          | 52               | m   | Malignant melanoma       | 2                                     | Cardiovascular         | Nivolumab                | 0                                           | 0                                    | 0                                        | Hyperthyroidism (asymptomatic)                                                                                                      | 0                         |
| 5          | 66               | m   | Malignant melanoma       | 0                                     | None                   | Nivolumab                | 0                                           | 0                                    | 0                                        | None                                                                                                                                | 0                         |
| 6          | 68               | f   | Malignant melanoma       | 3                                     | Cardiovascular         | Nivolumab                | 0                                           | 0                                    | 0                                        | <b>Tingling paresthesias,</b><br>pruritus, dry skin                                                                                 | 1                         |
| 7          | 66               | f   | Malignant melanoma       | 0                                     | None                   | Nivolumab                | 0                                           | 0                                    | 0                                        | <b>Mild tingling paresthesias</b>                                                                                                   | 1                         |
| 8          | 29               | m   | Malignant melanoma       | 0                                     | None                   | Nivolumab                | 0                                           | 0                                    | 0                                        | <b>Hypesthesia in fingertips and toes,</b><br>diarrhea                                                                              | 1                         |
| 9          | 48               | f   | Morbus Bowen             | 0                                     | None                   | Cemiplimab               | 0                                           | 0                                    | 0                                        | <b>Mild tingling paresthesias of both legs,</b><br>headache in the morning (spontaneous remission)                                  | 1                         |
| 10         | 36               | m   | Malignant melanoma       | 1                                     | None                   | Nivolumab/<br>Ipilimumab | 0                                           | 0                                    | 0                                        | <b>subjective decrease in strength, paresthesia right arm,</b><br>abdominal cramps, nausea,<br>dry mouth,<br>increased irritability | 1                         |

|    |    |   |                      |   |                       |                      |   |   |   |                                                                                                               |   |
|----|----|---|----------------------|---|-----------------------|----------------------|---|---|---|---------------------------------------------------------------------------------------------------------------|---|
| 11 | 72 | f | Malignant melanoma   | 0 | Cardiovascular        | Nivolumab            | 0 | 1 | 0 | <b>Intense muscle pain (myopathy), thyroiditis</b>                                                            | 2 |
| 12 | 75 | m | Malignant melanoma   | 0 | Cardiovascular_others | Nivolumab            | 1 | 1 | 0 | <b>Pronounced lack of strength, balance disorders</b>                                                         | 2 |
| 13 | 62 | m | Malignant melanoma   | 0 | Cardiovascular        | Nivolumab            | 0 | 0 | 0 | <b>Holocephalic headache with bulbar movement pain, intermittent paresthesias left hand, dizziness</b>        | 2 |
| 14 | 56 | m | Malignant melanoma   | 1 | Cardiovascular        | Nivolumab/Ipilimumab | 0 | 0 | 0 | <b>Myopathy (especially legs), nausea, vomiting, diarrhea, hypothyroidism, pruritus</b>                       | 2 |
| 15 | 52 | m | Renal cell carcinoma | 0 | Cardiovascular        | Nivolumab/Ipilimumab | 0 | 0 | 0 | <b>Hypesthesias, transient reduction in muscle strength</b>                                                   | 2 |
| 16 | 60 | m | Renal cell carcinoma | 0 | None                  | Nivolumab/Ipilimumab | 0 | 0 | 0 | <b>Transient cramps and weakness of the left hand and legs, dermatitis, mucositis °II</b>                     | 2 |
| 17 | 71 | m | Malignant melanoma   | 1 | None                  | Nivolumab            | 0 | 0 | 1 | <b>Marked worsening of preexisting tremor and double vision (suspected autoimmune encephalitis), dry skin</b> | 3 |
| 18 | 53 | m | Malignant melanoma   | 0 | None                  | Nivolumab            | 0 | 1 | 1 | <b>Manifest polyneuropathy with leg paresis, pruritic eczema</b>                                              | 3 |
| 19 | 62 | m | Tonsil carcinoma     | 0 | Cardiovascular        | Pembrolizumab        | 0 | 0 | 1 | <b>Demyelinating sensorimotor polyneuropathy, recurrent absencelike conditions, dermatitis III°</b>           | 3 |
| 20 | 66 | f | Malignant melanoma   | 2 | None                  | Nivolumab/Ipilimumab | 0 | 0 | 1 | <b>Giant cell arteritis with central retinal artery occlusion and left amaurosis</b>                          | 3 |
| 21 | 58 | f | Malignant melanoma   | 1 | None                  | Nivolumab/Ipilimumab | 1 | 0 | 1 | <b>Autoimmunencephalitis, demyelinating polyneuropathy, lichenoid drug exanthema, vitiligo</b>                | 3 |

**Supplemental table 1:** Characterization of patients in whom cytokines and neurofilaments were analyzed (so-called "serum subgroup"). Neurological adverse events are indicated in bold. AE: adverse event, CTCAE: common terminology criteria for adverse events, F: female, ICI: immune checkpoint inhibitor, irAE: immune related adverse event, m: male.
